# Supplementary material for: In situ/photoinduced fabrication of Zn/ZnO nanoscale hetero-interfaces with concomitant generation of solar hydrogen
Source: Royal Society of Chemistry journal article supplement (doi:10.1039/d2nj05431k), 2023-01-01
Supplement: d2nj05431k1.pdf [file d2nj05431k1.pdf]

## Supplementary Information

### Energy-dispersive X-ray spectrum:

| <i>Element</i> | <i>Wt%</i> | <i>At%</i> |
|----------------|------------|------------|
| <b>OK</b>      | 06.31      | 21.59      |
| <b>ZnK</b>     | 93.69      | 78.41      |
| <b>Matrix</b>  | Correction | ZAF        |

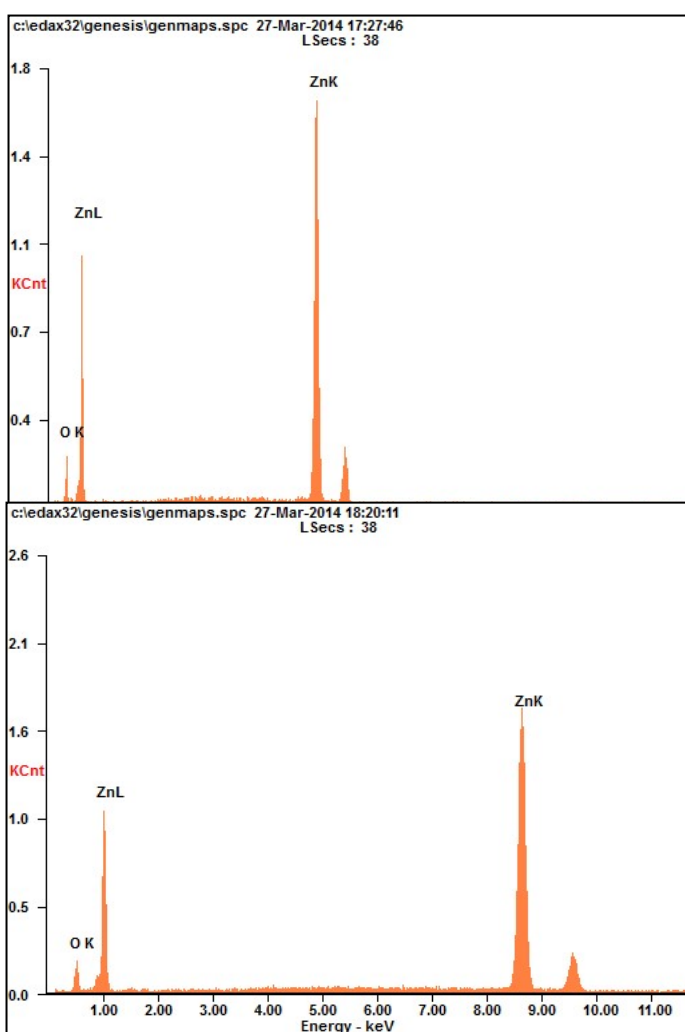

**Fig.S1 (a):** EDX spectrum for Zn(NP)/ZnO(R)

| <i>Element</i> | <i>Wt%</i> | <i>At%</i> |
|----------------|------------|------------|
| <b>OK</b>      | 07.19      | 24.04      |
| <b>ZnK</b>     | 92.81      | 75.96      |
| <b>Matrix</b>  | Correction | ZAF        |

**Fig.S1 (b):** EDX spectrum for Zn(NP)/ZnO(S)

### Raman spectra:

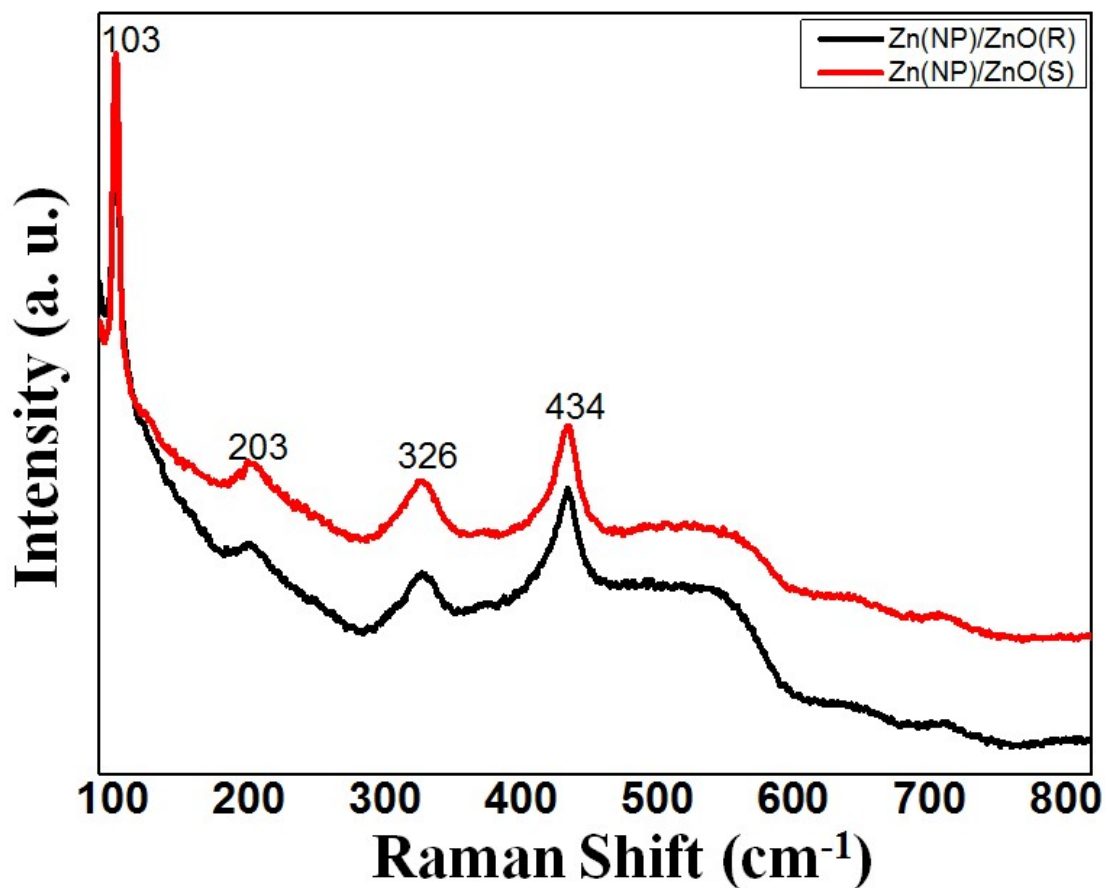

Fig. S2: Raman spectra for Zn(NP)/ZnO(R) and Zn(NP)/ZnO(S)

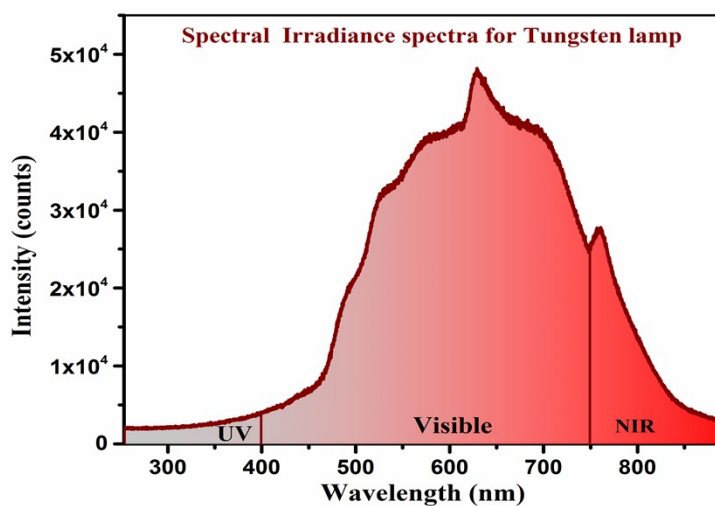

Fig. S3 . Irradiance spectra of Tungsten lamp.

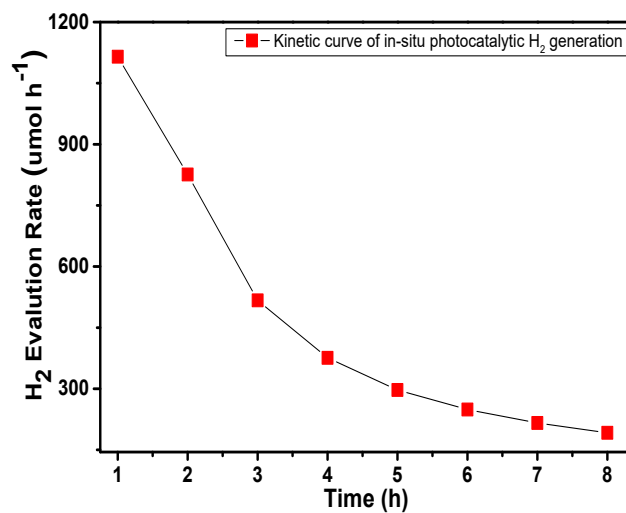

**Fig. S4** Hydrogen evolution rate Vs. Time

**Table S1:** Change in Hydrogen evolution rate increasing with time

| Time (hour) | Hydrogen Evolution rate (μmol h <sup>-1</sup> ) |
|-------------|-------------------------------------------------|
| 1           | 1115                                            |
| 2           | 826                                             |
| 3           | 517                                             |
| 4           | 376                                             |
| 5           | 297                                             |
| 6           | 249                                             |
| 7           | 216                                             |
| 8           | 192                                             |

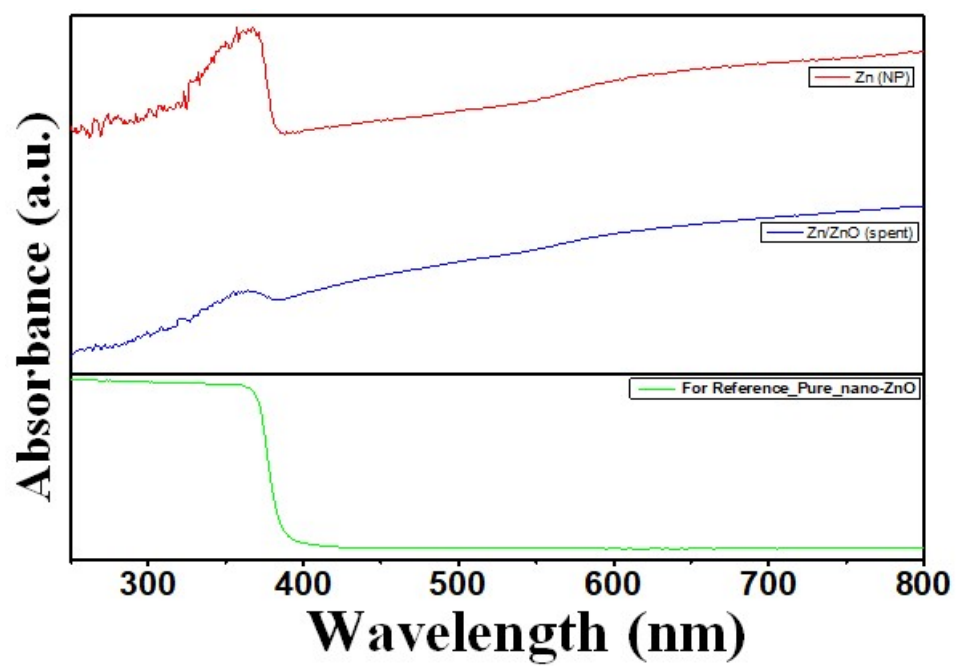

**Fig. S5.** UV-visible absorbance spectra for Zn (NP), Zn/ZnO (spent), and Pure nano-ZnO for comparison.
